# Supplementary material for: Risk Factors for Postoperative Deep Infection after Instrumented Spinal Fusion Surgeries for Degenerative Spinal Disease: A Nationwide Cohort Study of 194,036 Patients
Source: MDPI journal article supplement (doi:10.3390/jcm11030778), 2022-01-31
Supplement: s1 [file s1]

Supplementary Table S1. HIRA general name codes for used prophylactic intravenous antibiotics

| Category of antibiotics | Type of antibiotics                  | ATC code | HIRA general name code |
|-------------------------|--------------------------------------|----------|------------------------|
| 1st gen. cephalosporin  | cefazolin sodium 1g                  | J01DB04  | 125701BIJ              |
|                         | ceftezole sodium 1g                  | J01DB12  | 128501BIJ              |
|                         | ceftezole sodium 2g                  | J01DB12  | 128502BIJ              |
|                         | ceftezole sodium 0.5g                | J01DB12  | 128503BIJ              |
|                         | cefazedone sodium 1g                 | J01DB06  | 130001BIJ              |
|                         | cefazedone sodium 2g                 | J01DB06  | 130002BIJ              |
|                         | cefazedone sodium 0.5g               | J01DB06  | 130003BIJ              |
|                         | cefradine 1g                         | J01DB09  | 130102BIJ              |
| 2nd gen. cephalosporin  | cefamandole nafate 1g                | J01DC03  | 125401BIJ              |
|                         | cefmetazole sodium 1g                | J01DC09  | 126501BIJ              |
|                         | cefmetazole sodium 0.5g              | J01DC09  | 126502BIJ              |
|                         | cefmetazole sodium 2g                | J01DC09  | 126503BIJ              |
|                         | cefmetazole sodium 1g                | J01DC09  | 468100BIJ              |
|                         | cefbuperazone sodium 1g              | J01DC13  | 125801BIJ              |
|                         | cefbuperazone sodium 0.5g            | J01DC13  | 125802BIJ              |
|                         | cefminox sodium 1g                   | J01DC12  | 126601BIJ              |
|                         | cefotetan disodium (as cefotetan 1g) | J01DC05  | 127201BIJ              |
|                         | cefotetan disodium 1g                | J01DC05  | 482900BIJ              |
|                         | cefotiam hydrochloride 1g            | J01DC07  | 127301BIJ              |
|                         | cefotiam hydrochloride 0.5g          | J01DC07  | 127302BIJ              |
|                         | cefotiam hydrochloride 0.3mg         | J01DC07  | 127303BIJ              |
|                         | cefotiam hydrochloride 1g            | J01DC07  | 465400BIJ              |
|                         | cefuroxime sodium 1.5g               | J01DC02  | 129001BIJ              |
|                         | cefuroxime sodium 0.75g              | J01DC02  | 129003BIJ              |
|                         | flomoxef sodium 0.5g                 | J01DC14  | 159501BIJ              |
| 3rd gen. cephalosporin  | ceftazidime hydrate 1g               | J01DD02  | 128301BIJ              |
|                         | ceftazidime hydrate 0.5g             | J01DD02  | 128302BIJ              |
|                         | ceftazidime hydrate 2g               | J01DD02  | 128303BIJ              |
|                         | cefodizime sodium 1g                 | J01DD09  | 126701BIJ              |
|                         | cefodizime sodium 0.5g               | J01DD09  | 126702BIJ              |
|                         | cefotaxime sodium 1g                 | J01DD01  | 127101BIJ              |
|                         | cefotaxime sodium 2g                 | J01DD01  | 127102BIJ              |
|                         | cefotaxime sodium 0.5g               | J01DD01  | 127103BIJ              |
|                         | cefoxitin sodium 1g                  | J01DC01  | 127501BIJ              |
|                         | cefpiramide sodium 1g                | J01DD11  | 127701BIJ              |
|                         | cefpiramide sodium 0.5g              | J01DD11  | 127702BIJ              |
|                         | cefprome sulfate 1g                  | J01DE02  | 127801BIJ              |
|                         | ceftizoxime sodium 1g                | J01DD07  | 128701BIJ              |
|                         | ceftriaxone sodium hydrate 1g        | J01DD04  | 128801BIJ              |
|                         | ceftriaxone sodium hydrate 0.25g     | J01DD04  | 128802BIJ              |
|                         | ceftriaxone sodium hydrate 2g        | J01DD04  | 128803BIJ              |
|                         | ceftriaxone sodium hydrate 0.5g      | J01DD04  | 128804BIJ              |
|                         | ceftriaxone sodium hydrate 1.5g      | J01DD04  | 128805BIJ              |
|                         | ceftriaxone sodium 1g                | J01DD04  | 468200BIJ              |

|                            |                                                                         |                                 |         |           |
|----------------------------|-------------------------------------------------------------------------|---------------------------------|---------|-----------|
|                            | ceftriaxone sodium                                                      | 2g                              | J01DD04 | 478500BIJ |
|                            | cefoperazone sodium                                                     | 0.5g                            | J01DD12 | 329900BIJ |
|                            | cefoperazone sodium                                                     | 1g                              | J01DD12 | 557400BIJ |
|                            | cefoperazone sodium                                                     | 0.5g                            | J01DD12 | 463100BIJ |
| 4th gen. cephalosporin     | cefepime hydrochloride hydrate                                          | 1g                              | J01DE01 | 126101BIJ |
|                            | cefepime hydrochloride hydrate                                          | 0.5g                            | J01DE01 | 126103BIJ |
|                            | cefepime hydrochloride hydrate·L-arginine<br>(as cefepime hydrochloride | 1g)                             | J01DE01 | 800001BIJ |
|                            |                                                                         |                                 |         |           |
| Other beta-lactams         | benzathine penicillin G                                                 | 120M unit                       | J01CE08 | 115502BIJ |
|                            | penicillin G potassium crystal                                          | 5MI.U                           | J01CE01 | 210001BIJ |
|                            | piperacillin sodium                                                     | 2g tazobactam 0.25g             | J01CR05 | 329500BIJ |
|                            | piperacillin sodium                                                     | 4g tazobactam 0.5g              | J01CR05 | 329600BIJ |
|                            | amoxicillin sodium                                                      | 0.5g clavulanate potassium 0.1g | J01CR02 | 328900BIJ |
|                            | amoxicillin sodium                                                      | 1g clavulanate potassium 0.2g   | J01CR02 | 329000BIJ |
|                            | amoxicillin sodium (as amoxicillin                                      | 1g)                             | J01CA04 | 108201BIJ |
|                            | amoxicillin sodium (as amoxicillin                                      | 0.5g)                           | J01CA04 | 108203BIJ |
|                            | ampicillin sodium                                                       | 0.5g                            | J01CA01 | 108603BIJ |
|                            | nafticillin sodium                                                      | 1g                              | J01CF06 | 360801BIJ |
|                            | amoxicillin sodium                                                      | 1g sulbactam sodium 0.5g        | J01CR02 | 381300BIJ |
|                            | amoxicillin sodium                                                      | 0.5g sulbactam sodium 0.25g     | J01CR02 | 381500BIJ |
|                            | ampicillin sodium                                                       | 0.5g sulbactam sodium 0.25g     | J01CR01 | 328500BIJ |
|                            | ampicillin sodium                                                       | 1g sulbactam sodium 0.5g        | J01CR01 | 328600BIJ |
|                            | piperacillin sodium                                                     | 1g sulbactam sodium 0.5g        | J01CR05 | 433300BIJ |
|                            | piperacillin sodium                                                     | 2g sulbactam sodium 1g          | J01CR05 | 453200BIJ |
|                            | piperacillin sodium                                                     | 3g sulbactam sodium 1.5g        | J01CR05 | 657600BIJ |
|                            |                                                                         |                                 |         |           |
|                            |                                                                         |                                 |         |           |
|                            |                                                                         |                                 |         |           |
| Glycopeptide and linezolid | teicoplanin                                                             | 0.2g                            | J01XA02 | 234901BIJ |
|                            | teicoplanin                                                             | 0.4g                            | J01XA02 | 234902BIJ |
|                            | teicoplanin                                                             | 0.2g                            | J01XA02 | 501000BIJ |
|                            | vancomycin hydrochloride                                                | 1g                              | J01XA01 | 247203BIJ |
|                            | vancomycin hydrochloride                                                | 0.25g                           | J01XA01 | 247204BIJ |
|                            | vancomycin hydrochloride                                                | 0.5g                            | J01XA01 | 247205BIJ |
|                            | linezolid                                                               | 0.6g(2mg/mL)                    | J01XX08 | 412930BIJ |
|                            | vancomycin hydrochloride                                                | 1g                              | J01XA01 | 479800BIJ |
| Lincosamide                | lincomycin hydrochloride                                                | 0.3g(0.3g/mL)                   | J01FF02 | 184230BIJ |
|                            | lincomycin hydrochloride                                                | 0.6g(0.3g/mL)                   | J01FF02 | 184231BIJ |
|                            | clindamycin phosphate                                                   | 0.3g(0.15g/mL)                  | J01FF01 | 135630BIJ |
|                            | clindamycin phosphate                                                   | 0.6g(0.15g/mL)                  | J01FF01 | 135631BIJ |
| Macrolide                  | amikacin sulfate                                                        | 0.25g(0.125g/mL)                | J01GB06 | 106831BIJ |
|                            | amikacin sulfate                                                        | 0.5g(0.25g/mL)                  | J01GB06 | 106833BIJ |
|                            | amikacin sulfate                                                        | 0.5g(5mg/mL)                    | J01GB06 | 106834BIJ |
|                            | tobramycin                                                              | 80mg(40mg/mL)                   | J01GB01 | 240841BIJ |
|                            | tobramycin                                                              | 0.1g(50mg/mL)                   | J01GB01 | 240843BIJ |
|                            | azithromycin hydrate (as azithromycin                                   | 0.5g)                           | J01FA10 | 112734BIJ |
|                            | gentamicin sulfate                                                      | 80mg(40mg/mL)                   | J01GB03 | 165136BIJ |
|                            | isepamicin sulfate                                                      | 0.2g(0.1g/mL)                   | J01GB11 | 177730BIJ |
|                            | netilmicin sulfate                                                      | 0.15g(0.1g/mL)                  | J01GB07 | 200732BIJ |
|                            |                                                                         |                                 |         |           |

|            |                                             |                            |         |           |
|------------|---------------------------------------------|----------------------------|---------|-----------|
|            | netilmicin sulfate                          | 50mg(25mg/mL)              | J01GB07 | 200730BIJ |
|            | netilmicin sulfate                          | 0.1g(50mg/mL)              | J01GB07 | 200731BIJ |
|            | netilmicin sulfate                          | 0.15g(75mg/mL)             | J01GB07 | 200733BIJ |
|            | ribostamycin sulfate                        | 0.5g(0.3333g/mL)           | J01GB10 | 223830BIJ |
|            | ribostamycin sulfate                        | 1g(0.3333g/mL)             | J01GB10 | 223831BIJ |
|            | ribostamycin sulfate                        | 1g                         | J01GB10 | 223801BIJ |
|            | ribostamycin sulfate                        | 0.5g                       | J01GB10 | 223802BIJ |
|            | spectinomycin hydrochloride                 | 2g                         | J01XX04 | 230801BIJ |
|            | arbakacin sulfate                           | 75mg(50mg/mL)              | J01GB12 | 360930BIJ |
|            | arbakacin sulfate                           | 0.1g(50mg/mL)              | J01GB12 | 360931BIJ |
| Carbapenem | meropenem                                   | 0.5g                       | J01DH02 | 190702BIJ |
|            | meropenem                                   | 1g                         | J01DH02 | 190703BIJ |
|            | meropenem                                   | 2g                         | J01DH02 | 190704BIJ |
|            | imipenem hydrate (as imipenem               | 0.25g)                     | J01DH51 | 329300BIJ |
|            | imipenem hydrate (as imipenem               | 0.5g)                      | J01DH51 | 329400BIJ |
|            | imipenem monohydrate                        | 0.5g                       | J01DH51 | 466100BIJ |
|            | ertapenem sodium (as ertapenem              | 1g)                        | J01DH03 | 447701BIJ |
|            | doripenem monohydrate (as doripenem         | 0.25g)                     | J01DH04 | 593201BIJ |
| Quinolone  | ciprofloxacin                               | 0.1g(2mg/mL)               | J01MA02 | 134133BIJ |
|            | ciprofloxacin                               | 0.2g(2mg/mL)               | J01MA02 | 134134BIJ |
|            | ciprofloxacin                               | 0.4g(2mg/mL)               | J01MA02 | 134135BIJ |
|            | levofloxacin                                | 0.25g(5mg/mL)              | J01MA12 | 183233BIJ |
|            | levofloxacin                                | 0.5g(5mg/mL)               | J01MA12 | 183234BIJ |
|            | levofloxacin                                | 0.75g(5mg/mL)              | J01MA12 | 183235BIJ |
|            | levofloxacin                                | 1g(5mg/mL)                 | J01MA12 | 183236BIJ |
|            | ofloxacin                                   | 0.2g(2mg/mL)               | J01MA01 | 203940BIJ |
|            | moxifloxacin hydrochloride (as moxifloxacin | 0.4g(1.6mg/mL))            | J01MA14 | 380335BIJ |
|            | gemifloxacin mesylate (as gemifloxacin      | 0.2g)                      | J01MA15 | 442902BIJ |
|            | moxifloxacin                                | 0.4g(1.6mg/mL)             | J01MA14 | 801601BIJ |
| ETC        | aztreonam                                   | 1g                         | J01DF01 | 113001BIJ |
|            | aztreonam                                   | 0.5g                       | J01DF01 | 113002BIJ |
|            | colistin sodium methanesulfonate            | 0.15g                      | J01XB01 | 484201BIJ |
|            | colistin sodium methanesulfonate            | 0.16g                      | J01XB01 | 484203BIJ |
|            | sulfamethoxazole                            | 0.4g(80mg/mL) trimethoprim | J01EE01 | 330000BIJ |
|            | 80mg(16mg/mL)                               |                            |         |           |

Supplementary Table S2. ICD-10 codes for comorbidities including Charlson comorbidities index items and scores

| Type of comorbidities                  | Category                                        | ICD-10 codes                                                                                   | Scores |
|----------------------------------------|-------------------------------------------------|------------------------------------------------------------------------------------------------|--------|
| Included in Charlson comorbidity index | Myocardial infarction                           | I21, I22, I25.2                                                                                | 1      |
|                                        | Congestive heart failure                        | I09.9, I11.0, I13.0, I13.2, I25.5, I42.0, I42.5-I42.9, I43, I50, P29.0                         | 1      |
|                                        | Peripheral vascular disease                     | I70, I71, I73.1, I73.8, I73.9, I77.1, I79.0, I79.2, K55.1, K55.8, K55.9, Z95.8, Z95.9          | 1      |
|                                        | Cerebrovascular disease                         | G45, G46, I60-I69, H34.0                                                                       | 1      |
|                                        | Dementia                                        | F00-F03, G30, F05.1, G31.1                                                                     | 1      |
|                                        | Chronic pulmonary disease                       | I27.8, I27.9, J40-J47, J60-J67, J68.4, J70.1, J70.3                                            | 1      |
|                                        | Rheumatologic disease                           | M05, M06, M31.5, M32-M34, M35.1, M35.3, M36.0                                                  | 1      |
|                                        | Peptic ulcer                                    | K25-K28                                                                                        | 1      |
|                                        | Hemiplegia or paraplegia                        | G04.1, G11.4, G80.1, G80.2, G81, G82, G83.0, G83.1, G83.2, G83.3, G83.4, G83.9                 | 2      |
|                                        | Diabetes without complication                   | E10.0, E10.1, E10.6, E10.8                                                                     | 1      |
|                                        | Diabetes with complication                      | E10.9, E11.0, E11.1, E11.6, E11.8, E11.9, E12.0, E12.1,                                        | 2      |
|                                        |                                                 | E12.6, E12.8, E12.9, E13.0 E13.1, E13.6, E13.8, E13.9,                                         |        |
|                                        | Mild liver disease                              | E14.0, E14.1, E14.6, E14.8, E14.9                                                              | 1      |
|                                        |                                                 | B18, K70.0-K70.3, K70.9, K71.3-K71.5, K71.7, K73, K74, K76.0, K76.2-K76.4, K76.8, K76.9, Z94.4 |        |
|                                        | Moderate to severe liver disease                | I85.0, I85.9, I86.4, I98.2, K70.4, K71.1, K72.1, K72.9,                                        | 3      |
|                                        |                                                 | K76.5-K76.7                                                                                    |        |
|                                        | Moderate to severe renal disease                | I12.0, I13.1, N03.2-N03.7, N05.2-N05.7, N18, N19, N25.0, Z49.0-Z49.2, Z94.0, Z99.2             | 2      |
|                                        | Any malignancy (including leukemia or lymphoma) | C00-C26, C30-C34, C37-C41, C43, C45-C58, C60-C76                                               | 2      |
|                                        | Metastatic solid tumor                          | C81-C85, C88, C90-C97                                                                          | 6      |
|                                        | Acquired immunodeficiency syndrome              | C77-C80                                                                                        | 6      |
| Others                                 | Osteoporosis                                    | B20-B22, B24                                                                                   | -      |
|                                        | End stage renal disease                         | M80-M82                                                                                        | -      |
|                                        |                                                 | E10.22, E11.22, E12.22, E13.32, E14.22, N18.5, Z99.2 (V001, V003)                              | -      |

Supplementary Table S3. HIRA therapeutic codes for transfusion

| Type of transfusion     | HIRA therapeutic code                                                                   |
|-------------------------|-----------------------------------------------------------------------------------------|
| Autologous transfusion  | X6001-X6008                                                                             |
| Allogeneous transfusion | X2021, X2022, X2031, X2032, X2091, X2092, X2111, X2131, X2132, X2512, X2515, X9006-9007 |

Supplementary Table S4. HIRA general name codes for used steroids

| Category of steroid | Type of steroid                                 | ATC code | HIRA general name code |
|---------------------|-------------------------------------------------|----------|------------------------|
| Oral steroid        | deflazacort 6 mg                                | H02AB13  | 140801ATB              |
|                     | dexamethasone 0.5 mg                            | H02AB02  | 141901ATB              |
|                     | dexamethasone 0.75 mg                           | H02AB02  | 141903ATB              |
|                     | betamethasone 0.25 mg + d-chlorpheniramine 2 mg | H02AB01  | 296900ATB              |
|                     | hydrocortisone 10 mg                            | H02AB09  | 116401ATB              |
|                     | hydrocortisone 5 mg                             | H02AB09  | 170901ATB              |
|                     | methylprednisolone 4 mg                         | H02AB04  | 193302ATB              |
|                     | methylprednisolone 1 mg                         | H02AB04  | 193305ATB              |
|                     | prednisolone 5 mg                               | H02AB06  | 217001ATB              |
|                     | triamcinolone 1 mg                              | H02AB08  | 243201ATB              |
|                     | triamcinolone 2 mg                              | H02AB08  | 243202ATB              |
|                     | triamcinolone 4 mg                              | H02AB08  | 243203ATB              |
| Intravenous steroid | fludrocortisone 100 µg                          | H02AA02  | 160201ATB              |
|                     | dexamethasone 4 mg                              | H02AB02  | 142030BIJ              |
|                     | dexamethasone 4 mg                              | H02AB02  | 142230BIJ              |
|                     | dexamethasone 5 mg                              | H02AB02  | 142232BIJ              |
|                     | betamethasone 4 mg                              | H02AB01  | 116530BIJ              |
|                     | hydrocortisone 100 mg                           | H02AB09  | 171201BIJ              |
|                     | methylprednisolone 125 mg                       | H02AB04  | 193601BIJ              |
|                     | methylprednisolone 40 mg                        | H02AB04  | 193603BIJ              |
|                     | methylprednisolone 500 mg                       | H02AB04  | 193604BIJ              |
|                     | triamcinolone 10 mg                             | H02AB08  | 243336BIJ              |
|                     | triamcinolone 40 mg                             | H02AB08  | 243335BIJ              |
|                     | triamcinolone 40 mg                             | H02AB08  | 243337BIJ              |

Supplementary Table S5. (1) Risk factors for postoperative infection after instrumented spinal fusion among the patients with over 2-week antibiotics (model 1).  
(2) Risk factors for postoperative infection after instrumented spinal fusion among the patients with over 2-week antibiotics (model 2).

| (1)                              |                                        |                                                  |         |                                                            |                   |
|----------------------------------|----------------------------------------|--------------------------------------------------|---------|------------------------------------------------------------|-------------------|
| Variables                        | Category                               | Model 1                                          |         |                                                            |                   |
|                                  |                                        | Adjusted odds ratio<br>(95% confidence interval) | p-value | Bootstrap adjusted odds ratio<br>(95% confidence interval) | Relative bias (%) |
| Age                              | 50-59 vs 20-49                         | 1.1 (0.8 - 1.5)                                  | 0.610   | 1.1 (0.9 - 1.4)                                            | -5.3              |
|                                  | 60-69 vs 20-49                         | 1.3 (1.0 - 1.8)                                  | 0.051   | 1.3 (1.1 - 1.7)                                            | 0.9               |
|                                  | 70-79 vs 20-49                         | 1.4 (1.1 - 1.9)                                  | 0.021   | 1.4 (1.1 - 1.9)                                            | -0.1              |
|                                  | 80+ vs 20-49                           | 1.9 (1.3 - 2.7)                                  | <0.001  | 1.9 (1.5 - 2.6)                                            | 1.1               |
| Sex                              | Male vs female                         | 1.8 (1.6 - 2.1)                                  | <0.001  | 1.8 (1.6 - 2.1)                                            | 1.2               |
| Regions                          | Rural vs urban                         | 1.3 (1.1 - 1.5)                                  | 0.004   | 1.3 (1.1 - 1.5)                                            | 0.0               |
| Surgical approach                | Cervical anterior vs lumbar posterior  | 0.2 (0.1 - 0.3)                                  | <0.001  | 0.2 (0.1 - 0.2)                                            | 1.5               |
|                                  | Cervical posterior vs lumbar posterior | 0.4 (0.2 - 0.7)                                  | 0.005   | 0.3 (0.2 - 0.6)                                            | 10.5              |
|                                  | Thoracic anterior vs lumbar posterior  | 1.4 (0.2 - 10.3)                                 | 0.725   | 0.1 (0.0 - 4.2)                                            | -841.8            |
|                                  | Thoracic posterior vs lumbar posterior | 1.4 (1.0 - 1.9)                                  | 0.063   | 1.4 (1.0 - 1.8)                                            | -6.0              |
|                                  | Lumbar anterior vs lumbar posterior    | 0.7 (0.4 - 1.5)                                  | 0.420   | 0.7 (0.3 - 1.3)                                            | 18.3              |
|                                  | Multiple vs lumbar posterior           | 1.2 (1.1 - 1.4)                                  | 0.003   | 1.2 (1.1 - 1.4)                                            | -2.3              |
| Cage                             |                                        | 1.1 (0.9 - 1.2)                                  | 0.410   | 1.2 (0.9 - 1.2)                                            | 14.3              |
| Charlson comorbidity index score | 3-5 vs 0-2                             | 0.9 (0.8 - 1.2)                                  | 0.760   | 0.9 (0.8 - 1.1)                                            | 38.3              |
|                                  | over 6 vs 0-2                          | 1.2 (0.7 - 1.9)                                  | 0.479   | 1.2 (0.8 - 1.6)                                            | -13.5             |
| Comorbidities                    | Congestive heart failure               | 1.2 (0.9 - 1.6)                                  | 0.173   | 1.2 (1.0 - 1.5)                                            | -2.1              |
|                                  | Cerebrovascular disease                | 1.5 (1.2 - 1.8)                                  | <0.001  | 1.5 (1.2 - 1.7)                                            | -1.0              |
|                                  | Peripheral vascular disease            | 1.2 (1.0 - 1.5)                                  | 0.023   | 1.2 (1.1 - 1.4)                                            | -1.7              |
|                                  | Chronic pulmonary disease              | 1.2 (1.0 - 1.3)                                  | 0.050   | 1.2 (1.1 - 1.3)                                            | 2.2               |
|                                  | Rheumatologic disease                  | 1.6 (1.3 - 2.0)                                  | <0.001  | 1.6 (1.3 - 2.0)                                            | -3.0              |
|                                  | Dementia                               | 1.1 (1.3 - 2.0)                                  | 0.791   | 1.0 (0.7 - 1.5)                                            | -52.7             |
|                                  | Peptic ulcer                           | 1.0 (0.9 - 1.2)                                  | 0.817   | 1.0 (0.9 - 1.2)                                            | 41.9              |
|                                  | Liver disease                          | 1.4 (1.1 - 1.6)                                  | <0.001  | 1.4 (1.2 - 1.6)                                            | 0.3               |
|                                  | Diabetes                               | 1.4 (1.2 - 1.6)                                  | <0.001  | 1.4 (1.2 - 1.6)                                            | -1.0              |
|                                  | Hemiplegia or paraplegia               | 1.6 (1.1 - 2.5)                                  | 0.022   | 1.6 (1.1 - 2.3)                                            | -7.6              |
|                                  | Renal disease                          | 0.9 (0.6 - 1.3)                                  | 0.496   | 0.8 (0.6 - 1.2)                                            | 14.5              |
|                                  | End stage renal disease                | 1.6 (0.8 - 3.0)                                  | 0.173   | 1.5 (0.9 - 2.7)                                            | -3.5              |
|                                  | Malignancy, primary                    | 1.1 (0.8 - 1.5)                                  | 0.510   | 1.1 (0.9 - 1.4)                                            | 0.8               |
|                                  | Osteoporosis                           | 1.1 (1.0 - 1.3)                                  | 0.122   | 1.1 (1.0 - 1.3)                                            | 1.6               |
| Allogeneous transfusion          |                                        | 1.6 (1.4 - 1.9)                                  | <0.001  | 1.6 (1.4 - 1.8)                                            | 0.6               |

|                  |                          |                 |       |                 |       |
|------------------|--------------------------|-----------------|-------|-----------------|-------|
| Systemic steroid | Within 2 weeks vs no use | 1.0 (0.9 - 1.2) | 0.529 | 1.0 (0.9 - 1.2) | -11.8 |
|                  | Over 2 weeks vs no use   | 1.3 (1.0 - 1.7) | 0.032 | 1.3 (1.0 - 1.7) | 2.2   |

(2)

| Variables               | Category                               | Model 2 (backward)                               |         |                                                            |                   |
|-------------------------|----------------------------------------|--------------------------------------------------|---------|------------------------------------------------------------|-------------------|
|                         |                                        | Adjusted odds ratio<br>(95% confidence interval) | p-value | Bootstrap adjusted odds ratio<br>(95% confidence interval) | Relative bias (%) |
| Age                     | 60-69 vs 20-49                         | 1.4 (1.0 - 1.8)                                  | 0.038   | 1.4 (1.1 - 1.8)                                            | 1.3               |
|                         | 70-79 vs 20-49                         | 1.5 (1.1 - 2.0)                                  | 0.010   | 1.5 (1.2 - 2.0)                                            | 0.3               |
|                         | 80+ vs 20-49                           | 1.9 (1.3 - 2.8)                                  | <0.001  | 2.0 (1.5 - 2.7)                                            | 1.2               |
| Sex                     | Male vs female                         | 1.8 (1.6 - 2.0)                                  | <0.001  | 1.8 (1.6 - 2.0)                                            | 1.0               |
| Regions                 | Rural vs urban                         | 1.3 (1.1 - 1.5)                                  | 0.003   | 1.3 (1.1 - 1.5)                                            | 0.1               |
| Surgical approach       | Cervical anterior vs lumbar posterior  | 0.2 (0.1 - 0.3)                                  | <0.001  | 0.2 (0.1 - 0.3)                                            | 1.5               |
|                         | Cervical posterior vs lumbar posterior | 0.4 (0.2 - 0.8)                                  | 0.005   | 0.4 (0.2 - 0.6)                                            | 11.0              |
|                         | Thoracic posterior vs lumbar posterior | 1.4 (1.0 - 2.0)                                  | 0.041   | 1.4 (1.0 - 1.9)                                            | -5.6              |
|                         | Multiple vs lumbar posterior           | 1.3 (1.1 - 1.5)                                  | <0.001  | 1.3 (1.1 - 1.4)                                            | -1.6              |
| Comorbidities           | Cerebrovascular disease                | 1.5 (1.3 - 1.8)                                  | <0.001  | 1.5 (1.3 - 1.7)                                            | -1.6              |
|                         | Peripheral vascular disease            | 1.2 (1.1 - 1.5)                                  | 0.010   | 1.2 (1.1 - 1.4)                                            | -2.6              |
|                         | Chronic pulmonary disease              | 1.2 (1.0 - 1.4)                                  | 0.017   | 1.2 (1.1 - 1.3)                                            | 0.5               |
|                         | Rheumatologic disease                  | 1.7 (1.4 - 2.1)                                  | <0.001  | 1.7 (1.4 - 2.0)                                            | -3.1              |
|                         | Liver disease                          | 1.4 (1.2 - 1.6)                                  | <0.001  | 1.4 (1.2 - 1.6)                                            | -0.5              |
|                         | Diabetes                               | 1.4 (1.2 - 1.6)                                  | <0.001  | 1.4 (1.3 - 1.6)                                            | -1.0              |
|                         | Hemiplegia or paraplegia               | 1.7 (1.2 - 2.5)                                  | 0.008   | 1.6 (1.2 - 2.2)                                            | -8.1              |
| Allogeneous transfusion |                                        | 1.6 (1.4 - 1.9)                                  | <0.001  | 1.7 (1.5 - 1.9)                                            | 0.7               |

All significant independent variables ( $p < 0.05$ ) from the univariable analysis were included in the model 1. Relative bias was estimated as the difference between the mean bootstrapped regression coefficient estimates and the mean parameter estimates of model 1 divided by the mean parameter estimates of model 1. All significant independent variables ( $p < 0.05$ ) from the univariable analysis were initially included and subsequently chosen by backward stepwise selection in model 2. Relative bias was estimated as the difference between the mean bootstrapped regression coefficient estimates and the mean parameter estimates of model 2 divided by the mean parameter estimates of model 2.

Supplementary Table S6. (1) Risk factors for postoperative infection after instrumented spinal fusion among the patients with over 6-week antibiotics (model 1).  
(2) Risk factors for postoperative infection after instrumented spinal fusion among the patients with over 6-week antibiotics (model 2).

| (1)                              |                                        |                                                  |         |                                                            |                   |
|----------------------------------|----------------------------------------|--------------------------------------------------|---------|------------------------------------------------------------|-------------------|
| Variables                        | Category                               | Model 1                                          |         |                                                            |                   |
|                                  |                                        | Adjusted odds ratio<br>(95% confidence interval) | p-value | Bootstrap adjusted odds ratio<br>(95% confidence interval) | Relative bias (%) |
| Age                              | 50-59 vs 20-49                         | 1.0 (0.6 - 1.5)                                  | 0.858   | 0.9 (0.6 - 1.4)                                            | 91.5              |
|                                  | 60-69 vs 20-49                         | 1.5 (1.0 - 2.2)                                  | 0.053   | 1.4 (1.0 - 2.0)                                            | -9.1              |
|                                  | 70-79 vs 20-49                         | 1.5 (1.0 - 2.2)                                  | 0.064   | 1.4 (1.0 - 2.0)                                            | -9.9              |
|                                  | 80+ vs 20-49                           | 1.5 (0.9 - 2.5)                                  | 0.092   | 1.5 (0.9 - 2.3)                                            | -6.7              |
| Sex                              | Male vs female                         | 1.9 (1.6 - 2.3)                                  | <0.001  | 1.9 (1.7 - 2.2)                                            | 0.2               |
| Regions                          | Rural vs urban                         | 1.4 (1.1 - 1.7)                                  | 0.002   | 1.4 (1.2 - 1.6)                                            | 3.0               |
| Surgical approach                | Cervical anterior vs lumbar posterior  | 0.2 (0.1 - 0.3)                                  | <0.001  | 0.2 (0.1 - 0.2)                                            | 2.4               |
|                                  | Cervical posterior vs lumbar posterior | 0.4 (0.1 - 0.9)                                  | 0.026   | 0.3 (0.1 - 0.7)                                            | 22.2              |
|                                  | Thoracic anterior vs lumbar posterior  | 2.4 (0.3 - 17.3)                                 | 0.387   | 0.1 (0.0 - 7.0)                                            | -360.3            |
|                                  | Thoracic posterior vs lumbar posterior | 1.3 (0.8 - 2.0)                                  | 0.289   | 1.2 (0.8 - 1.9)                                            | -18.6             |
|                                  | Lumbar anterior vs lumbar posterior    | 0.9 (0.4 - 2.1)                                  | 0.893   | 0.9 (0.4 - 1.7)                                            | 120.6             |
|                                  | Multiple vs lumbar posterior           | 1.3 (1.1 - 1.6)                                  | 0.004   | 1.3 (1.1 - 1.5)                                            | -5.8              |
| Cage                             |                                        | 1.1 (0.9 - 1.3)                                  | 0.461   | 1.1 (0.9 - 1.4)                                            | 11.7              |
| Charlson comorbidity index score | 3-5 vs 0-2                             | 1.0 (0.8 - 1.4)                                  | 0.798   | 1.0 (0.8 - 1.3)                                            | -32.3             |
|                                  | over 6 vs 0-2                          | 1.3 (0.7 - 2.3)                                  | 0.428   | 1.3 (0.8 - 2.1)                                            | 2.3               |
| Comorbidities                    | Congestive heart failure               | 1.1 (0.8 - 1.6)                                  | 0.591   | 1.1 (0.8 - 1.4)                                            | 3.0               |
|                                  | Cerebrovascular disease                | 1.6 (1.3 - 2.0)                                  | <0.001  | 1.6 (1.3 - 1.9)                                            | -2.2              |
|                                  | Peripheral vascular disease            | 1.3 (1.1 - 1.7)                                  | 0.011   | 1.3 (1.1 - 1.6)                                            | 3.3               |
|                                  | Chronic pulmonary disease              | 1.2 (1.0 - 1.5)                                  | 0.044   | 1.2 (1.0 - 1.4)                                            | -5.9              |
|                                  | Rheumatologic disease                  | 1.5 (1.1 - 2.1)                                  | 0.005   | 1.5 (1.2 - 1.9)                                            | -5.2              |
|                                  | Peptic ulcer                           | 1.0 (0.8 - 1.3)                                  | 0.891   | 1.0 (0.9 - 1.2)                                            | 8.3               |
|                                  | Liver disease                          | 1.4 (1.1 - 1.7)                                  | 0.005   | 1.4 (1.1 - 1.6)                                            | -3.6              |
|                                  | Diabetes                               | 1.5 (1.2 - 1.8)                                  | <0.001  | 1.5 (1.2 - 1.7)                                            | 0.9               |
|                                  | Hemiplegia or paraplegia               | 2.2 (1.4 - 3.5)                                  | 0.001   | 2.2 (1.4 - 3.3)                                            | -0.6              |
|                                  | Renal disease                          | 0.9 (0.6 - 1.5)                                  | 0.754   | 0.9 (0.6 - 1.4)                                            | -1.6              |
|                                  | End stage renal disease                | 1.9 (0.9 - 4.0)                                  | 0.099   | 1.7 (0.8 - 3.7)                                            | -16.7             |
|                                  | Malignancy, primary                    | 1.2 (0.8 - 1.7)                                  | 0.302   | 1.2 (0.9 - 1.5)                                            | -6.8              |
|                                  | Osteoporosis                           | 1.3 (1.1 - 1.6)                                  | 0.013   | 1.3 (1.1 - 1.5)                                            | 2.2               |
| Allogeneous transfusion          |                                        | 1.5 (1.2 - 1.7)                                  | <0.001  | 1.4 (1.3 - 1.7)                                            | -0.2              |
| Systemic steroid                 | Within 2 weeks vs no use               | 1.1 (0.9 - 1.3)                                  | 0.450   | 1.1 (0.9 - 1.2)                                            | -9.0              |



| Type of hospital        | Over 2 weeks vs no use                 | 1.6 (1.2 - 2.2)                                  | 0.004   | 1.6 (1.2 - 2.1)                                            | 0.9               |
|-------------------------|----------------------------------------|--------------------------------------------------|---------|------------------------------------------------------------|-------------------|
|                         | Tertiary vs others                     | 1.0 (0.8 - 1.3)                                  | 0.6862  | 1.0 (0.9 - 1.3)                                            | 7.4               |
|                         | General hospital vs others             | 1.2 (1.0 - 1.5)                                  | 0.0824  | 1.3 (1.1 - 1.5)                                            | 42.4              |
| (2)                     |                                        |                                                  |         |                                                            |                   |
| Variables               | Category                               | Model 2 (backward)                               |         |                                                            |                   |
|                         |                                        | Adjusted odds ratio<br>(95% confidence interval) | p-value | Bootstrap adjusted odds ratio<br>(95% confidence interval) | Relative bias (%) |
| Age                     | 60-69 vs 20-49                         | 1.5 (1.0 - 2.2)                                  | 0.045   | 1.5 (1.1 - 2.1)                                            | -0.6              |
|                         | 70-79 vs 20-49                         | 1.5 (1.0 - 2.2)                                  | 0.048   | 1.5 (1.1 - 2.1)                                            | 6.1               |
| Sex                     | Male vs female                         | 2.0 (1.7 - 2.4)                                  | <0.001  | 1.8 (1.6 - 2.1)                                            | -10.2             |
| Regions                 | Rural vs urban                         | 1.4 (1.2 - 1.7)                                  | <0.001  | 1.4 (1.2 - 1.7)                                            | 2.4               |
| Surgical approach       | Cervical anterior vs lumbar posterior  | 0.2 (0.1 - 0.3)                                  | <0.001  | 0.2 (0.1 - 0.2)                                            | 2.2               |
|                         | Cervical posterior vs lumbar posterior | 0.4 (0.2 - 0.9)                                  | 0.028   | 0.3 (0.1 - 0.7)                                            | 22.8              |
|                         | Multiple vs lumbar posterior           | 1.3 (1.1 - 1.6)                                  | 0.002   | 1.3 (1.1 - 1.5)                                            | -4.0              |
| Comorbidities           | Cerebrovascular disease                | 1.7 (1.4 - 2.1)                                  | <0.001  | 1.7 (1.4 - 2.0)                                            | -0.8              |
|                         | Peripheral vascular disease            | 1.4 (1.1 - 1.7)                                  | 0.003   | 1.4 (1.1 - 1.6)                                            | 5.0               |
|                         | Chronic pulmonary disease              | 1.3 (1.1 - 1.5)                                  | 0.010   | 1.3 (1.1 - 1.5)                                            | -1.3              |
|                         | Rheumatologic disease                  | 1.6 (1.2 - 2.1)                                  | 0.002   | 1.6 (1.3 - 2.0)                                            | 0.8               |
|                         | Liver disease                          | 1.4 (1.2 - 1.8)                                  | <0.001  | 1.4 (1.2 - 1.7)                                            | -0.9              |
|                         | Diabetes                               | 1.5 (1.3 - 1.8)                                  | <0.001  | 1.5 (1.3 - 1.7)                                            | 0.4               |
|                         | Hemiplegia or paraplegia               | 2.4 (1.5 - 3.7)                                  | <0.001  | 2.4 (1.5 - 3.4)                                            | 0.1               |
|                         | End stage renal disease                | 1.9 (1.0 - 3.7)                                  | 0.040   | 1.8 (0.9 - 3.1)                                            | -15.5             |
| Allogeneous transfusion |                                        | 1.5 (1.2 - 1.7)                                  | <0.001  | 1.5 (1.3 - 1.7)                                            | 1.0               |
| Systemic steroid        | Over 2 weeks vs no use                 | 1.6 (1.2 - 2.2)                                  | 0.003   | 1.6 (1.2 - 2.1)                                            | 1.1               |

All significant independent variables ( $p < 0.05$ ) from the univariable analysis were included in the model 1. Relative bias was estimated as the difference between the mean bootstrapped regression coefficient estimates and the mean parameter estimates of model 1 divided by the mean parameter estimates of model 1.

Supplementary Table S7. (1) Risk factors for postoperative infection after instrumented spinal fusion when postoperative infection only included an early infection within 60 days after the index surgery (model 1). (2) Risk factors for postoperative infection after instrumented spinal fusion when postoperative deep infection was defined as an infection that occurred within 60 days after the index surgery (model 2).

| (1)                              |                                        |                                                  |         |                                                            |                   |
|----------------------------------|----------------------------------------|--------------------------------------------------|---------|------------------------------------------------------------|-------------------|
| Variables                        | Category                               | Model 1                                          |         |                                                            |                   |
|                                  |                                        | Adjusted odds ratio<br>(95% confidence interval) | p-value | Bootstrap adjusted odds ratio<br>(95% confidence interval) | Relative bias (%) |
| Age                              | 50-59 vs 20-49                         | 1.6 (0.9 - 2.6)                                  | 0.097   | 1.5 (1.0 - 2.4)                                            | -1.5              |
|                                  | 60-69 vs 20-49                         | 1.9 (1.1 - 3.1)                                  | 0.013   | 1.9 (1.2 - 3.1)                                            | -0.8              |
|                                  | 70-79 vs 20-49                         | 1.9 (1.2 - 3.2)                                  | 0.013   | 1.9 (1.2 - 3.0)                                            | -0.8              |
|                                  | 80+ vs 20-49                           | 2.4 (1.3 - 4.5)                                  | 0.004   | 2.5 (1.3 - 4.4)                                            | 0.8               |
| Sex                              | Male vs female                         | 1.8 (1.4 - 2.2)                                  | <0.001  | 1.7 (1.5 - 2.0)                                            | -1.3              |
| Regions                          | Rural vs urban                         | 1.2 (1.0 - 1.6)                                  | 0.091   | 1.2 (1.0 - 1.5)                                            | -9.8              |
| Type of hospital                 | Tertiary vs others                     | 1.0 (0.8 - 1.3)                                  | 0.999   | 1.0 (0.8 - 1.2)                                            | -6509.3           |
|                                  | General hospital vs others             | 1.0 (0.8 - 1.3)                                  | 0.732   | 1.0 (0.8 - 1.3)                                            | -13.3             |
| Surgical approach                | Cervical anterior vs lumbar posterior  | 0.2 (0.1 - 0.3)                                  | <0.001  | 0.2 (0.1 - 0.3)                                            | 3.4               |
|                                  | Cervical posterior vs lumbar posterior | 0.6 (0.2 - 1.5)                                  | 0.253   | 0.5 (0.1 - 1.1)                                            | 35.1              |
|                                  | Thoracic anterior vs lumbar posterior  | 3.9 (0.5 - 28.2)                                 | 0.177   | 0.1 (0.0 - 13.4)                                           | -295.3            |
|                                  | Thoracic posterior vs lumbar posterior | 1.6 (1.0 - 2.7)                                  | 0.062   | 1.6 (1.0 - 2.4)                                            | -6.6              |
|                                  | Lumbar anterior vs lumbar posterior    | 0.9 (0.3 - 2.5)                                  | 0.850   | 0.7 (0.2 - 1.6)                                            | 219.8             |
|                                  | Multiple vs lumbar posterior           | 1.4 (1.2 - 1.8)                                  | 0.001   | 1.5 (1.2 - 1.7)                                            | 0.5               |
| Charlson comorbidity index score | 3-5 vs 0-2                             | 1.0 (0.6 - 1.4)                                  | 0.814   | 0.9 (0.7 - 1.3)                                            | 33.5              |
|                                  | over 6 vs 0-2                          | 1.1 (0.5 - 2.6)                                  | 0.755   | 1.1 (0.5 - 2.1)                                            | -42.7             |
| Comorbidities                    | Myocardial infarction                  | 2.0 (0.9 - 4.2)                                  | 0.085   | 1.7 (0.8 - 3.2)                                            | -17.8             |
|                                  | Congestive heart failure               | 1.2 (0.8 - 1.9)                                  | 0.369   | 1.2 (0.8 - 1.6)                                            | -8.5              |
|                                  | Cerebrovascular disease                | 1.3 (1.0 - 1.8)                                  | 0.065   | 1.3 (1.0 - 1.6)                                            | -5.5              |
|                                  | Peripheral vascular disease            | 1.3 (1.0 - 1.8)                                  | 0.034   | 1.3 (1.0 - 1.7)                                            | -3.0              |
|                                  | Chronic pulmonary disease              | 1.3 (1.0 - 1.6)                                  | 0.055   | 1.3 (1.0 - 1.5)                                            | 7.2               |
|                                  | Rheumatologic disease                  | 1.7 (1.2 - 2.4)                                  | 0.005   | 1.6 (1.2 - 2.2)                                            | -4.5              |
|                                  | Liver disease                          | 1.5 (1.2 - 2.0)                                  | 0.003   | 1.5 (1.2 - 1.8)                                            | -4.0              |
|                                  | Diabetes                               | 1.4 (1.1 - 1.8)                                  | 0.005   | 1.4 (1.2 - 1.8)                                            | 1.2               |
|                                  | Hemiplegia or paraplegia               | 1.8 (1.0 - 3.4)                                  | 0.098   | 1.7 (0.9 - 2.9)                                            | -5.9              |
|                                  | Osteoporosis                           | 1.1 (0.9 - 1.5)                                  | 0.308   | 1.1 (0.9 - 1.4)                                            | -0.8              |
|                                  |                                        |                                                  |         |                                                            |                   |
| Transfusion                      | Autologous                             | 1.6 (0.7 - 3.9)                                  | 0.296   | 1.3 (0.6 - 3.0)                                            | -43.3             |
|                                  | Allogeneous                            | 1.6 (1.3 - 2.0)                                  | <0.001  | 1.6 (1.4 - 1.9)                                            | 0.4               |
| Systemic steroid                 | Within 2 weeks vs no use               | 1.1 (0.9 - 1.4)                                  | 0.212   | 1.1 (1.0 - 1.4)                                            | 2.6               |
|                                  | Over 2 weeks vs no use                 | 1.4 (0.9 - 2.0)                                  | 0.143   | 1.3 (1.0 - 1.8)                                            | -7.9              |

(2)

| Variables               | Category                               | Model 2 (backward)                               |         |                                                            |                   |
|-------------------------|----------------------------------------|--------------------------------------------------|---------|------------------------------------------------------------|-------------------|
|                         |                                        | Adjusted odds ratio<br>(95% confidence interval) | p-value | Bootstrap adjusted odds ratio<br>(95% confidence interval) | Relative bias (%) |
| Age                     | 60-69 vs 20-49                         | 2.0 (1.2 - 3.3)                                  | 0.007   | 2.0 (1.3 - 3.2)                                            | -0.1              |
|                         | 70-79 vs 20-49                         | 2.1 (1.3 - 3.5)                                  | 0.004   | 2.1 (1.4 - 3.2)                                            | -0.1              |
|                         | 80+ vs 20-49                           | 2.7 (1.5 - 5.0)                                  | 0.001   | 2.7 (1.6 - 4.7)                                            | 1.2               |
| Sex                     | Male vs female                         | 1.7 (1.4 - 2.1)                                  | <0.001  | 1.7 (1.5 - 2.0)                                            | -1.6              |
| Surgical approach       | Cervical anterior vs lumbar posterior  | 0.2 (0.1 - 0.3)                                  | <0.001  | 0.2 (0.1 - 0.3)                                            | 3.6               |
|                         | Thoracic posterior vs lumbar posterior | 1.7 (1.0 - 2.8)                                  | 0.044   | 1.6 (1.1 - 2.4)                                            | -6.7              |
|                         | Multiple vs lumbar posterior           | 1.5 (1.2 - 1.8)                                  | <0.001  | 1.5 (1.3 - 1.8)                                            | 0.3               |
| Comorbidities           | Peripheral vascular disease            | 1.3 (1.0 - 1.7)                                  | 0.034   | 1.3 (1.0 - 1.6)                                            | -2.2              |
|                         | Rheumatologic disease                  | 1.7 (1.2 - 2.3)                                  | 0.004   | 1.6 (1.2 - 2.1)                                            | -4.1              |
|                         | Liver disease                          | 1.5 (1.2 - 1.9)                                  | 0.002   | 1.5 (1.2 - 1.8)                                            | -3.6              |
|                         | Diabetes                               | 1.3 (1.1 - 1.7)                                  | 0.005   | 1.4 (1.1 - 1.6)                                            | 2.3               |
| Allogeneous transfusion |                                        | 1.7 (1.3 - 2.0)                                  | <0.001  | 1.7 (1.4 - 2.0)                                            | 0.0               |

All significant independent variables ( $p < 0.05$ ) from the univariable analysis were included in the model 1. Relative bias was estimated as the difference between the mean bootstrapped regression coefficient estimates and the mean parameter estimates of model 1 divided by the mean parameter estimates of model 1. All significant independent variables ( $p < 0.05$ ) from the univariable analysis were initially included and subsequently chosen by backward stepwise selection in model 2. Relative bias was estimated as the difference between the mean bootstrapped regression coefficient estimates and the mean parameter estimates of model 2 divided by the mean parameter estimates of model 2.
